# Supplementary material for: Annexin A2 and Ahnak control cortical NuMA–dynein localization and mitotic spindle orientation
Source: Oxford University Press journal article supplement (doi:10.1242/jcs.259344), 2022-04-01
Supplement: jcs259344supp.pdf [file jcs259344supp.pdf]

Figure S1:

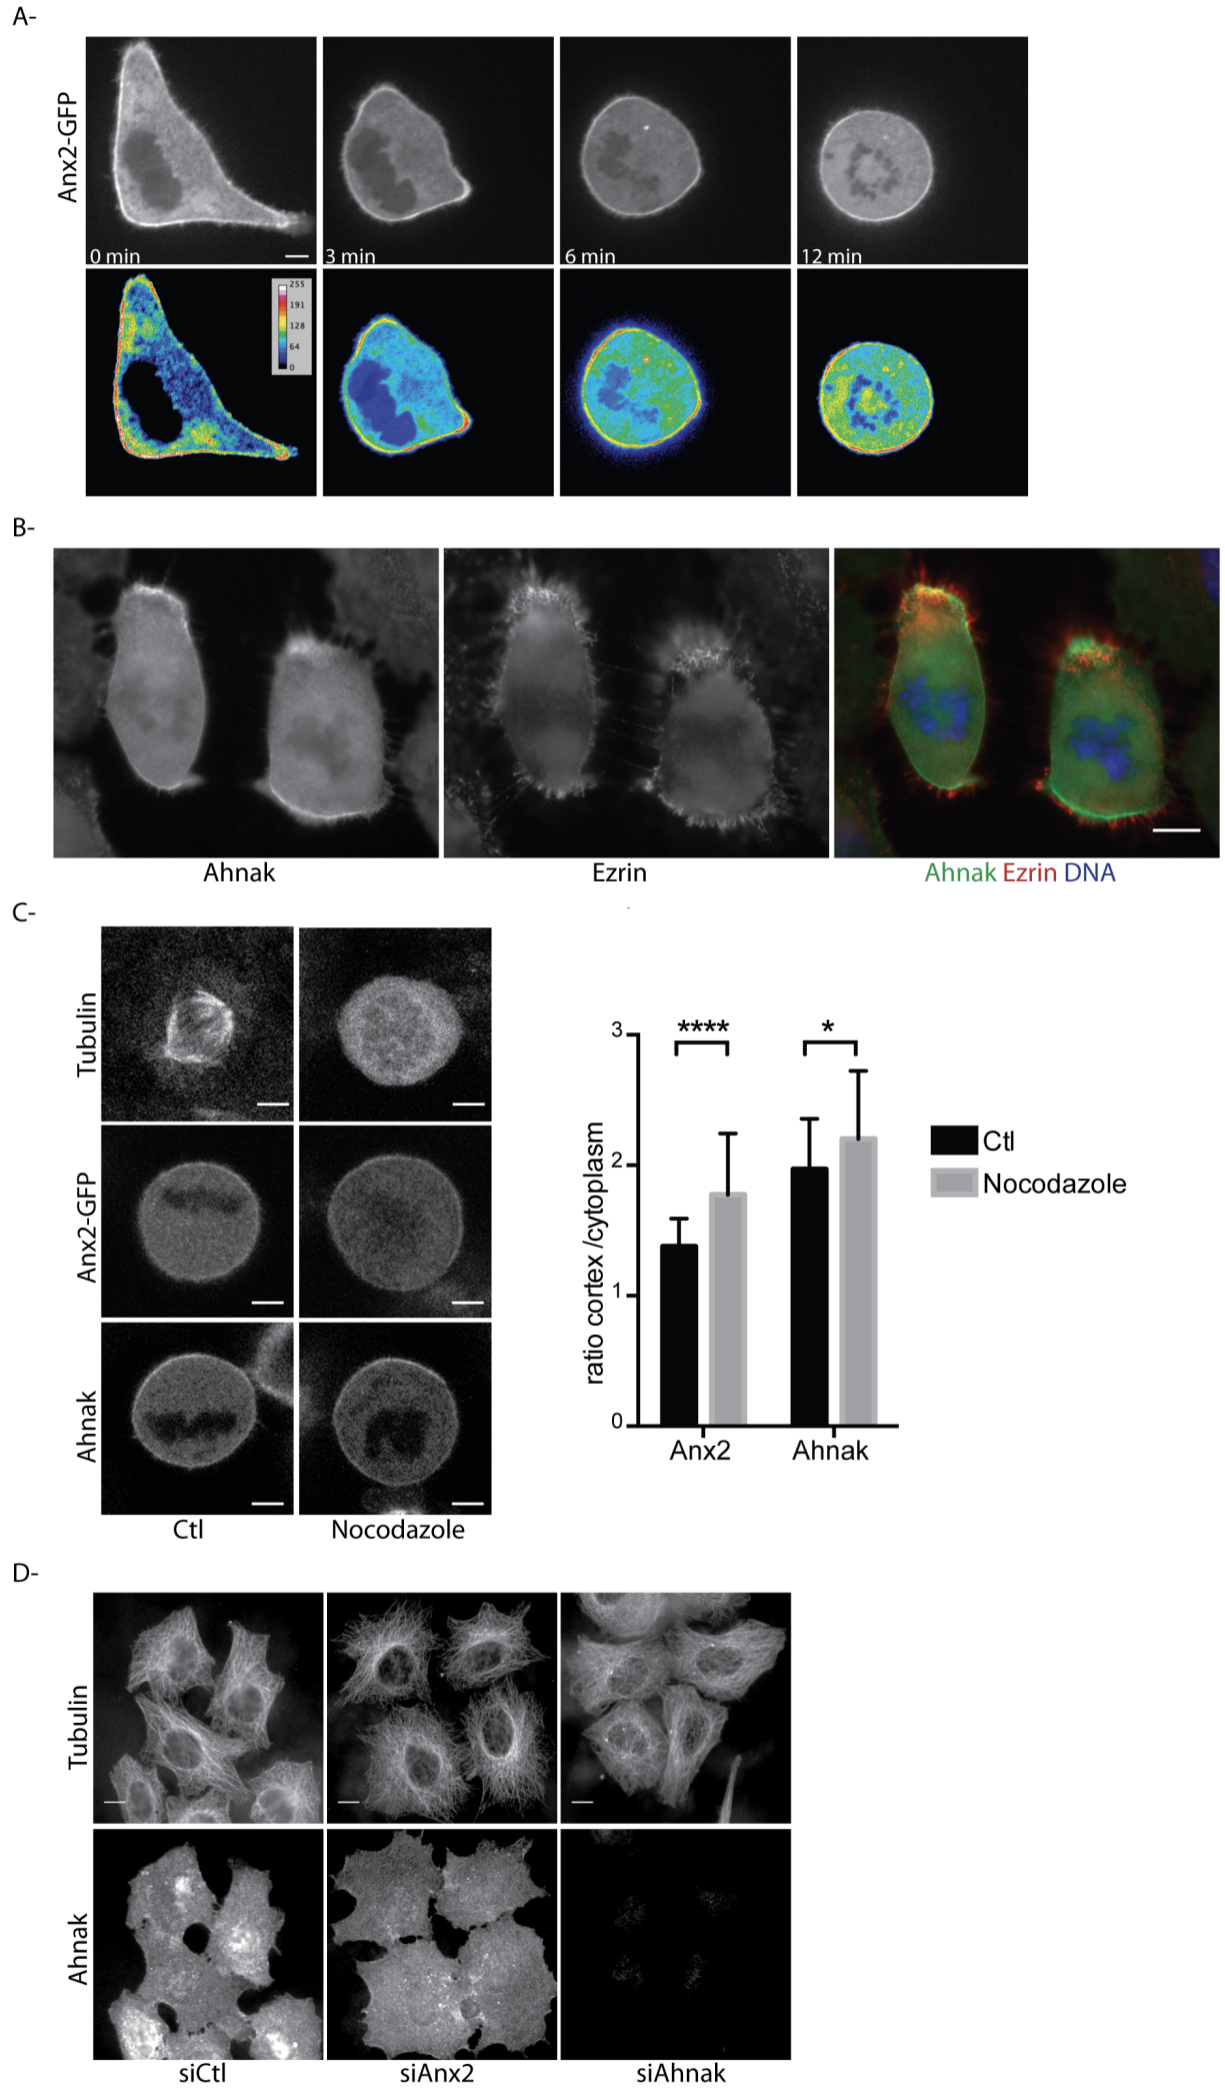

**Fig. S1. Adhesion controls cortical distribution of Anx2 and Ahnak.** **A-** Live time-lapse images of Anx2-GFP HeLa cells plated on L-shaped micropatterns imaged through early mitotic progression. Grey level (top) and 16 color ramp (bottom) images are shown. Scale bars: 5  $\mu\text{m}$ . **B-** Staining of endogenous ahnak and ezrin protein in rounding prometaphase cells. Scale bars: 10  $\mu\text{m}$ . **C-(left panel)** Confocal images of tubulin, Ahnak and Anx2-GFP (anti-GFP) metaphase cells in presence or absence of 10 $\mu\text{M}$  nocodazole for 1hr. **(right panel)** Quantification of Anx2-GFP and Ahnak cortical intensity (cortex/cytoplasm) in control and nocodazole treated cells.  $n>30$ ; \*\*\*\*,  $P < 0.0001$ ; \*,  $P = 0,0473$  (Anx2, Student t-test; Ahnak, Mann-Whitney U test). Scale bars: 5  $\mu\text{m}$ . **D-** Immunofluorescent images illustrating the ability of control, Anx2 siRNA and Ahnak siRNA treated cells to adhere and spread onto fibronectin coated coverslips. Cells were stained for  $\alpha$ -tubulin and Ahnak. Scale bars: 10  $\mu\text{m}$ . Graphs show means  $\pm$  SD from three independent experiments.

Figure S2:

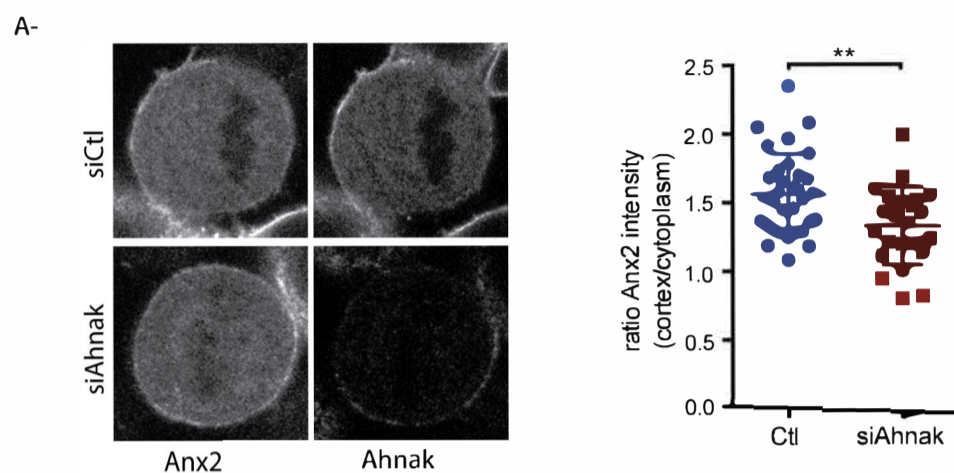

**Fig. S2. Influence of Ahnak on cortical Anx2 localization.** A-(left panel) Confocal images of Anx2 and Ahnak staining in metaphase HeLa control cells or cells treated with Ahnak siRNA. (right panel) Quantification of Anx2 cortical intensity (cortex/cytoplasm) in control and Ahnak siRNA treated cells.  $n > 30$ ;  $P = 0,0042$  (Mann-Whitney U test). Graphs show means  $\pm$  SD from three independent experiments.

Figure S3:

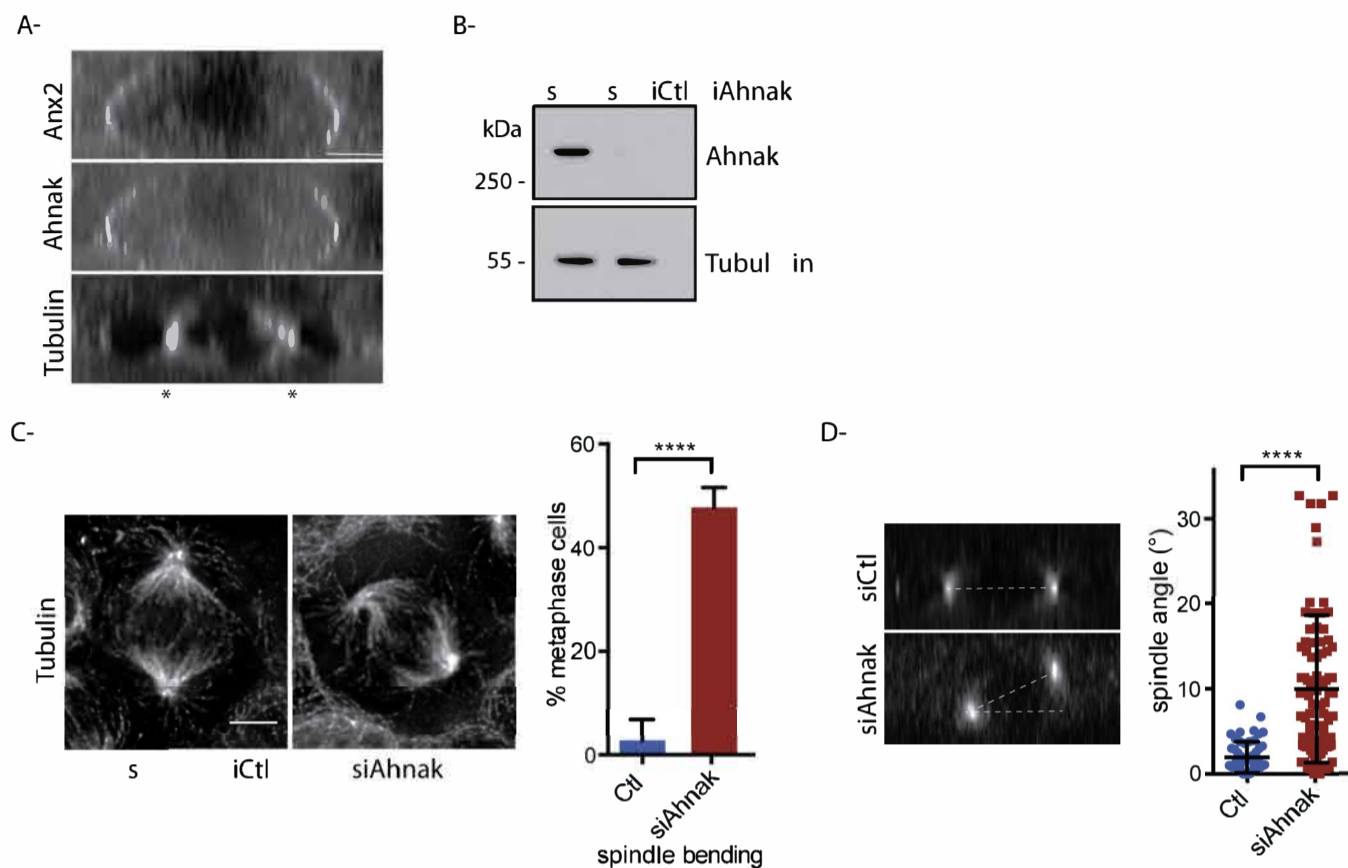

**Fig. S3. Anx2 and Ahnak are required for proper spindle positioning in MDCK cells.** **A-** x-z projection images of Anx2, Ahnak and tubulin staining in metaphase MDCK cells (stars indicates spindle pole). **B-** Western blot of lysates from control and Ahnak siRNA treated MDCK cells. **C-** (left panel) Deconvoluted images of tubulin staining of mitotic spindles in control and Ahnak siRNA treated metaphase cells. (right panel) Quantification of the percentage of control ( $n = 57$ ) and Ahnak siRNA ( $n = 84$ ) treated mitotic cells displaying spindle bending as illustrated in the left panel. \*\*\*\*,  $P < 0.0001$  (Mann-Whitney U test). **D-** (left panel) x-z projection images of centrosome staining in control and Ahnak siRNA treated metaphase cells. (right panel) Quantification of metaphase spindle angles relative to the adhesion plane in control ( $n = 55$ ) and Ahnak siRNA treated cells ( $n = 85$ ) each from three independent experiments. \*\*\*\*,  $P < 0.0001$  (Mann-Whitney U test). Graphs show means  $\pm$  SD from three independent experiments.

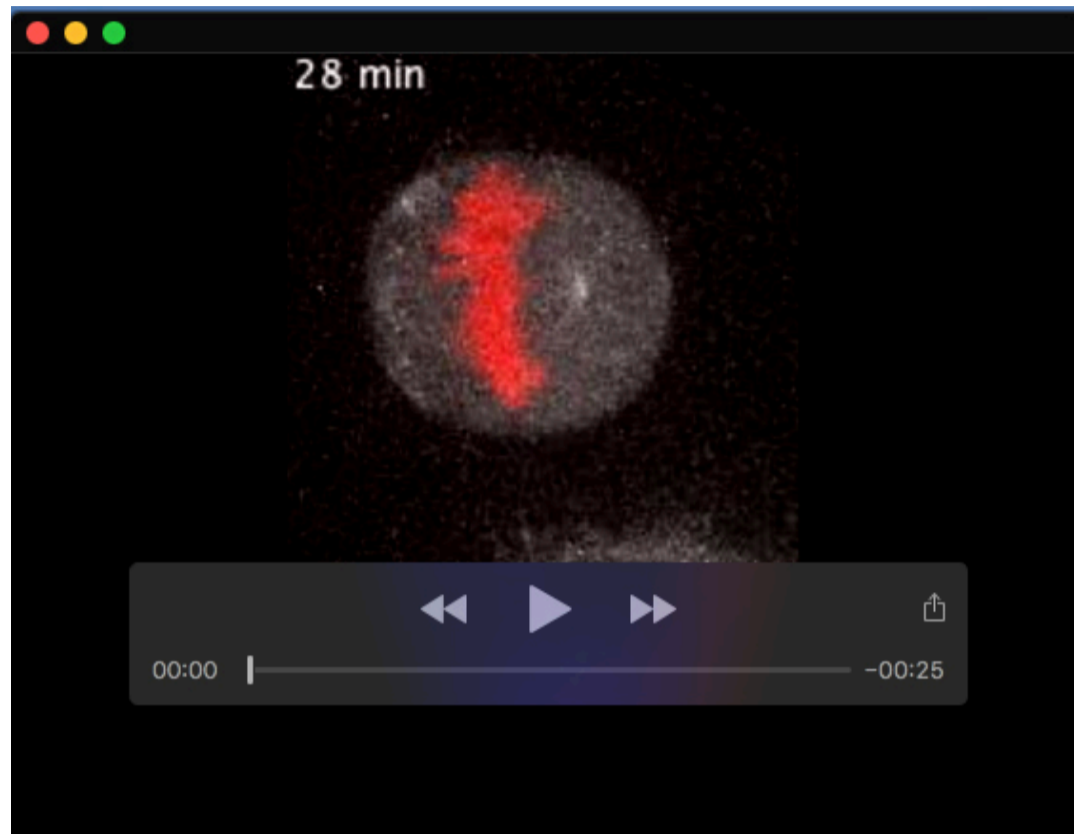

**Movie 1. Dynein in control cells.** HeLa DynHC-GFP cells expressing H2B-mChery were synchronized at the G2/M transition, released and imaged from prophase to anaphase onset. Dynein is in grey and DNA in red. Images were acquired every 4 min for 40 min. Max projection of Z stack presented. Movie 5 frame per seconds

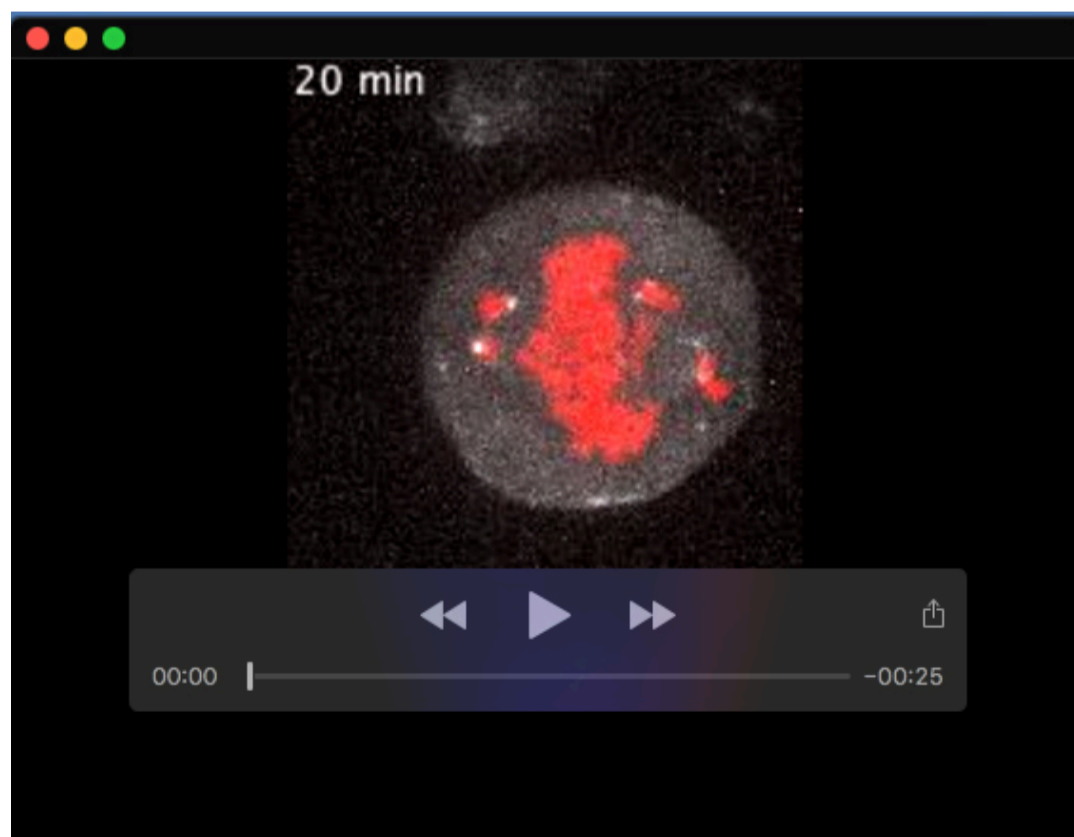

**Movie 2. Dynein in cells invalidated for Ahnak.** Experimental conditions identical to movie 1

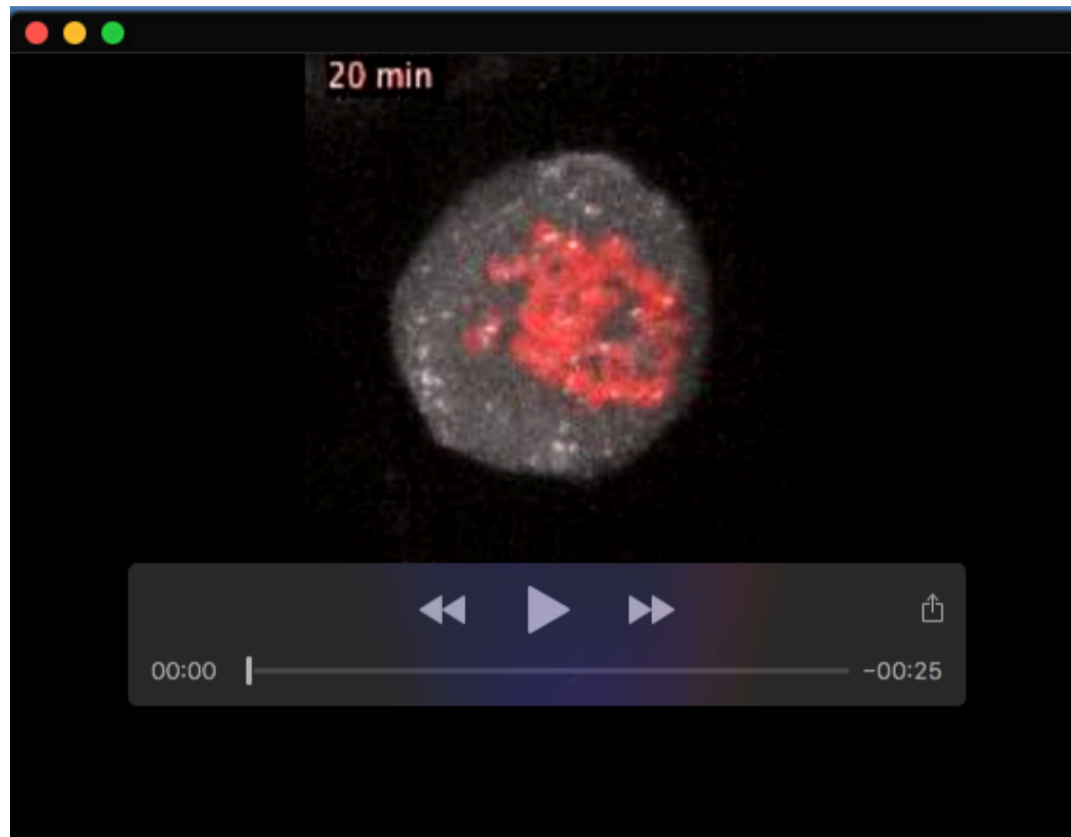

**Movie 3. Dynein in cells invalidated for Anx2.** Experimental conditions identical to movie 1
